# Supplementary material
Source: publisher figshare collection journal article supplement (https://tandf.figshare.com/ndownloader/files/20136272)
Supplement: Supplementary file 1 [file 20136272]

## SUPPLEMENTARY MATERIAL

### Sulphated flavones and pregnane-type steroids from *Helicteres viscida*

Luu Hong Truong<sup>a</sup>, Nguyen Hieu Cuong<sup>a</sup>, Tran Huu Dang<sup>a</sup>, Trinh Thi My Dung<sup>a</sup>,  
Pham Thi Cham<sup>b</sup>, Tran Thi Hong Hanh<sup>b</sup>, Tran Hong Quang<sup>b</sup>, Nguyen Hai Dang<sup>b</sup>,  
Nguyen Xuan Cuong<sup>b</sup>, Nguyen Hoai Nam,<sup>b,\*</sup> and Chau Van Minh<sup>b</sup>

<sup>a</sup>*Southern Institute of Ecology, Vietnam Academy of Science and Technology (VAST), Ho Chi Minh City, Vietnam;* <sup>b</sup>*Institute of Marine Biochemistry, VAST, Hanoi, Vietnam.*

\*To whom correspondence should be addressed: Email: namnguyenhoai@imbc.vast.vn  
(Nguyen Hoai Nam)

**ABSTRACT.** In our search for anti-inflammatory constituents from Vietnamese plants, the methanolic extract of *Helicteres viscida* was found to exhibit inhibitory effect on LPS-induced NO production in RAW264.7 cells. Phytochemical investigation of this plant led to isolation of four sulphated flavones (**1–4**), including one new compound 5,3',4'-trihydroxy-7-methoxy-8-*O*-sulphate flavone (**1**), and two pregnane-type steroids (**5** and **6**), including one new compound 7-*epi*-heligenin B (**5**). Their structures were elucidated by 1D and 2D NMR as well as HR-QTOF-MS experiments. Among isolated compounds, heligenin B (**6**) exhibited potent inhibitory effect on LPS-induced NO production in RAW264.7 cells with IC<sub>50</sub> of 1.23 ± 0.05 µM. The activity of **6** was comparable to that of the positive control cardamonin.

**Keywords:** *Helicteres viscida*, Malvaceae, sulphated flavone, pregnane-type steroid.

## CONTENTS

|                                                                                                                                     | Pages |
|-------------------------------------------------------------------------------------------------------------------------------------|-------|
| <b>General experimental procedures</b>                                                                                              | S2    |
| <b>Figure S1.</b> <sup>1</sup> H NMR spectrum (CD <sub>3</sub> OD, 500 MHz) of compound <b>1</b>                                    | S3    |
| <b>Figure S2.</b> <sup>13</sup> C NMR spectrum (CD <sub>3</sub> OD, 125 MHz) of compound <b>1</b>                                   | S3    |
| <b>Figure S3.</b> HSQC spectrum (CD <sub>3</sub> OD, 500 MHz) of compound <b>1</b>                                                  | S4    |
| <b>Figure S4.</b> HMBC spectrum (CD <sub>3</sub> OD, 500 MHz) of compound <b>1</b>                                                  | S4    |
| <b>Figure S5.</b> HR-QTOF mass spectrum of compound <b>1</b>                                                                        | S5    |
| <b>Figure S6.</b> <sup>1</sup> H NMR spectrum (CD <sub>3</sub> OD, 500 MHz) of compound <b>5</b>                                    | S5    |
| <b>Figure S7.</b> Expanded <sup>1</sup> H NMR spectrum (CD <sub>3</sub> OD, 500 MHz) of compound <b>5</b>                           | S6    |
| <b>Figure S8.</b> <sup>13</sup> C NMR spectrum (CD <sub>3</sub> OD, 125 MHz) of compound <b>5</b>                                   | S7    |
| <b>Figure S9.</b> Expanded <sup>13</sup> C NMR spectrum (CD <sub>3</sub> OD, 125 MHz) of compound <b>5</b>                          | S7    |
| <b>Figure S10.</b> HSQC spectrum (CD <sub>3</sub> OD, 500 MHz) of compound <b>5</b>                                                 | S8    |
| <b>Figure S11.</b> HMBC spectrum (CD <sub>3</sub> OD, 500 MHz) of compound <b>5</b>                                                 | S8    |
| <b>Figure S12.</b> COSY spectrum (CD <sub>3</sub> OD, 500 MHz) of compound <b>5</b>                                                 | S9    |
| <b>Figure S13.</b> NOESY spectrum (CD <sub>3</sub> OD, 500 MHz) of compound <b>5</b>                                                | S9    |
| <b>Figure S14.</b> Expanded NOESY spectrum (CD <sub>3</sub> OD, 500 MHz) of compound <b>5</b>                                       | S10   |
| <b>Figure S15.</b> HR-QTOF mass spectrum of compound <b>5</b>                                                                       | S10   |
| <b>Figure S16.</b> <sup>1</sup> H NMR spectrum (CD <sub>3</sub> OD, 500 MHz) of compound <b>6</b>                                   | S11   |
| <b>Figure S17.</b> <sup>13</sup> C NMR spectrum (CD <sub>3</sub> OD, 125 MHz) of compound <b>6</b>                                  | S11   |
| <b>Figure S18.</b> HSQC spectrum (CD <sub>3</sub> OD, 500 MHz) of compound <b>6</b>                                                 | S12   |
| <b>Figure S19.</b> HMBC spectrum (CD <sub>3</sub> OD, 500 MHz) of compound <b>6</b>                                                 | S12   |
| <b>Table S1.</b> <sup>13</sup> C NMR (CD <sub>3</sub> OD, 125 MHz) spectroscopic data of compounds <b>1</b> , <b>5</b> and <b>6</b> | S13   |

### General experimental procedures

Optical rotations were determined on a JASCO P-2000 polarimeter (Tokyo, Japan). The HR-QTOF mass spectra were recorded on an Agilent 6530 Accurate-Mass spectrometer (CA, USA). The <sup>1</sup>H NMR (500 MHz) and <sup>13</sup>C NMR (125 MHz) spectra were recorded on an AVANCE III HD 500 (Bruker, Germany) FT-NMR spectrometer with tetramethylsilane (TMS) as an internal standard. Medium pressure liquid chromatography (MPLC) was carried out on a Biotage - Isolera One system (SE-751 03 Uppsala, Sweden). Column chromatography (CC) was performed on silica gel (Kieselgel 60, 70–230 mesh and 230–400 mesh, Merck, Darmstadt, Germany) and YMC\*GEL (ODS-A, 12 nm S-150 mm, YMC Co., Ltd., Japan) resins. TLC used pre-coated silica gel 60 F<sub>254</sub> (Merck) and RP-18 F<sub>254</sub>S plates (Merck), and compounds were visualized by spraying with aqueous 10% H<sub>2</sub>SO<sub>4</sub> and heating for 3–5 min.

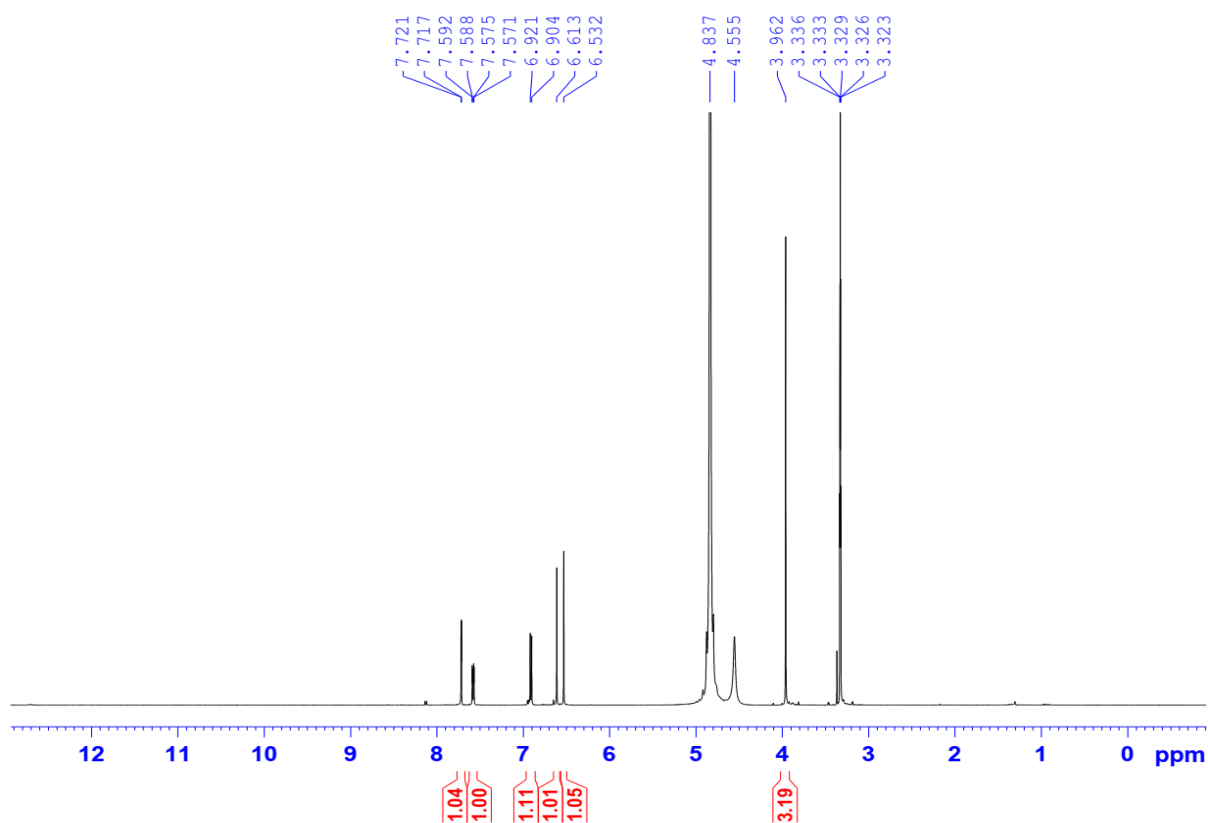

**Figure S1.** <sup>1</sup>H NMR spectrum (CD<sub>3</sub>OD, 500 MHz) of compound **1**

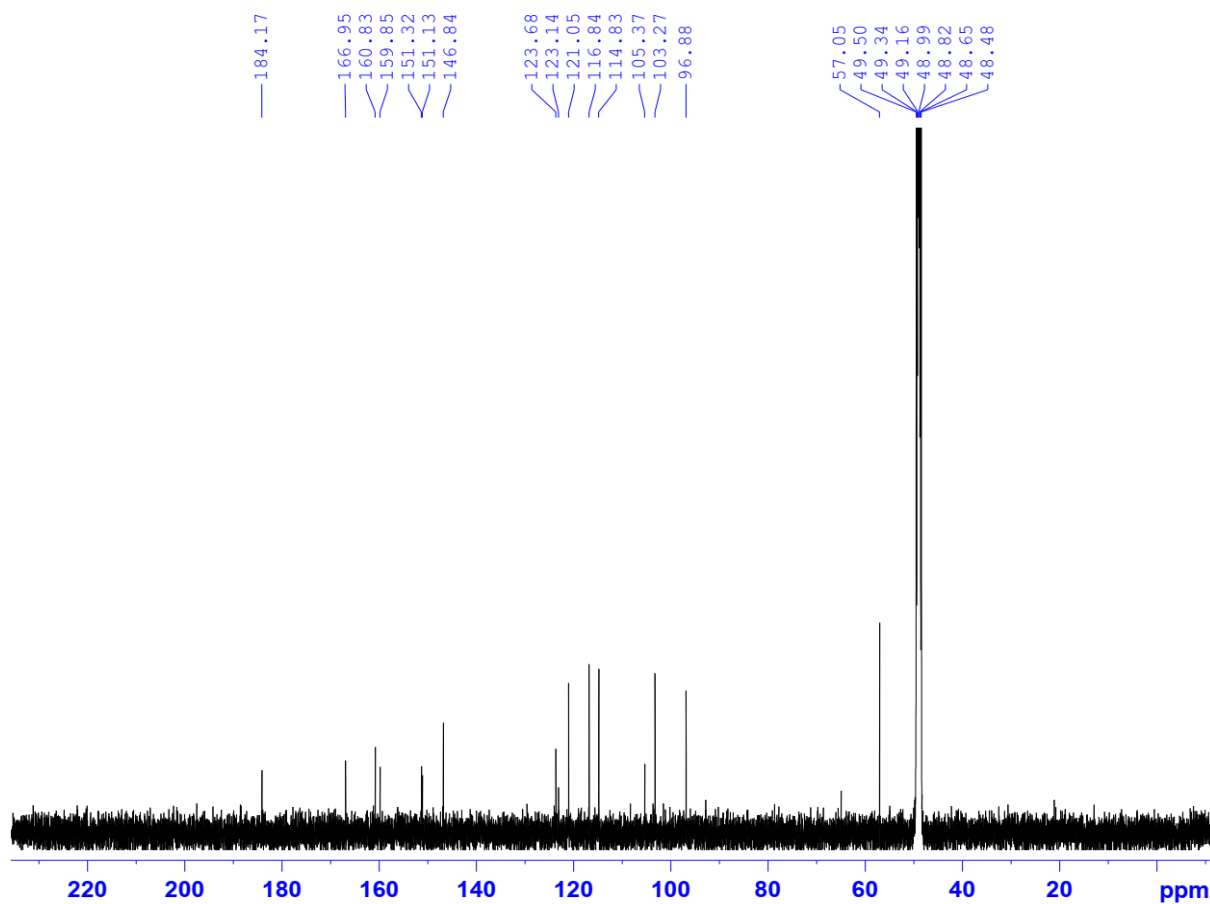

**Figure S2.** <sup>13</sup>C NMR spectrum (CD<sub>3</sub>OD, 125 MHz) of compound **1**

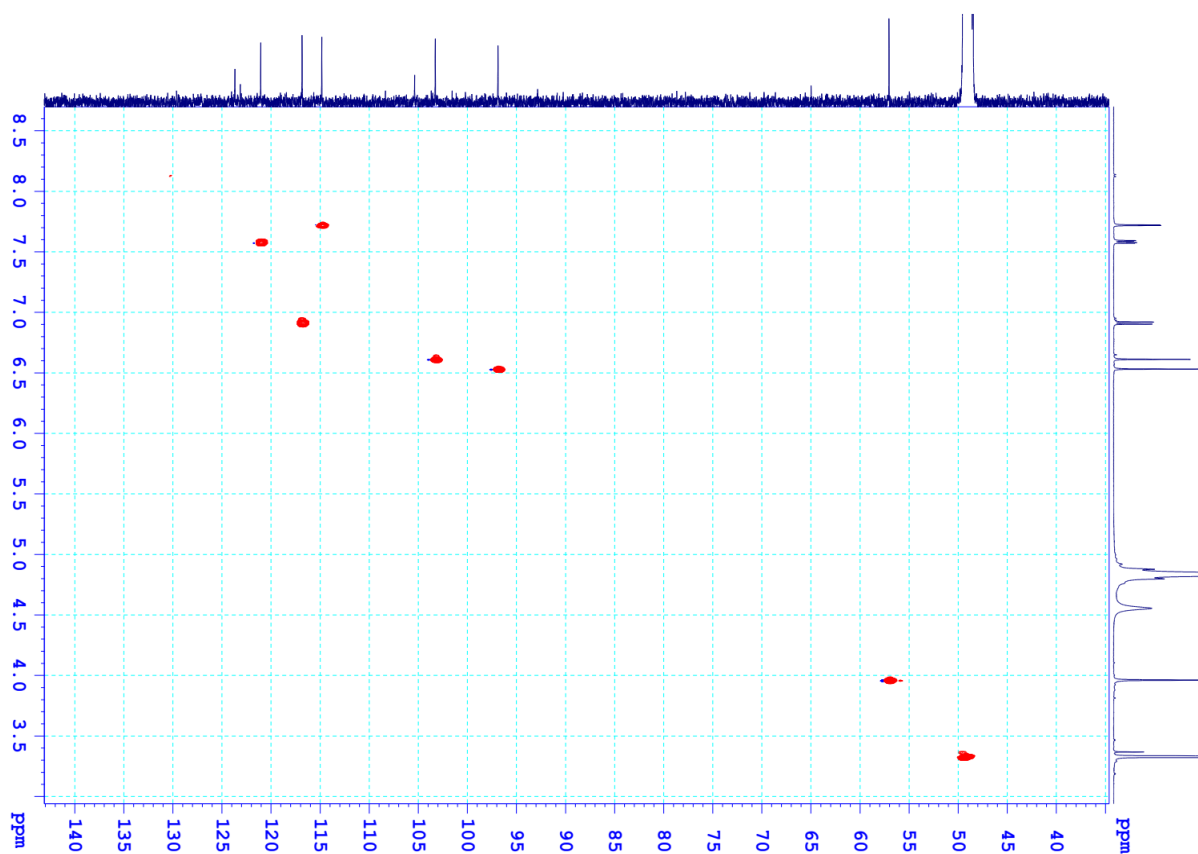

**Figure S3.** HSQC spectrum (CD<sub>3</sub>OD, 500 MHz) of compound **1**

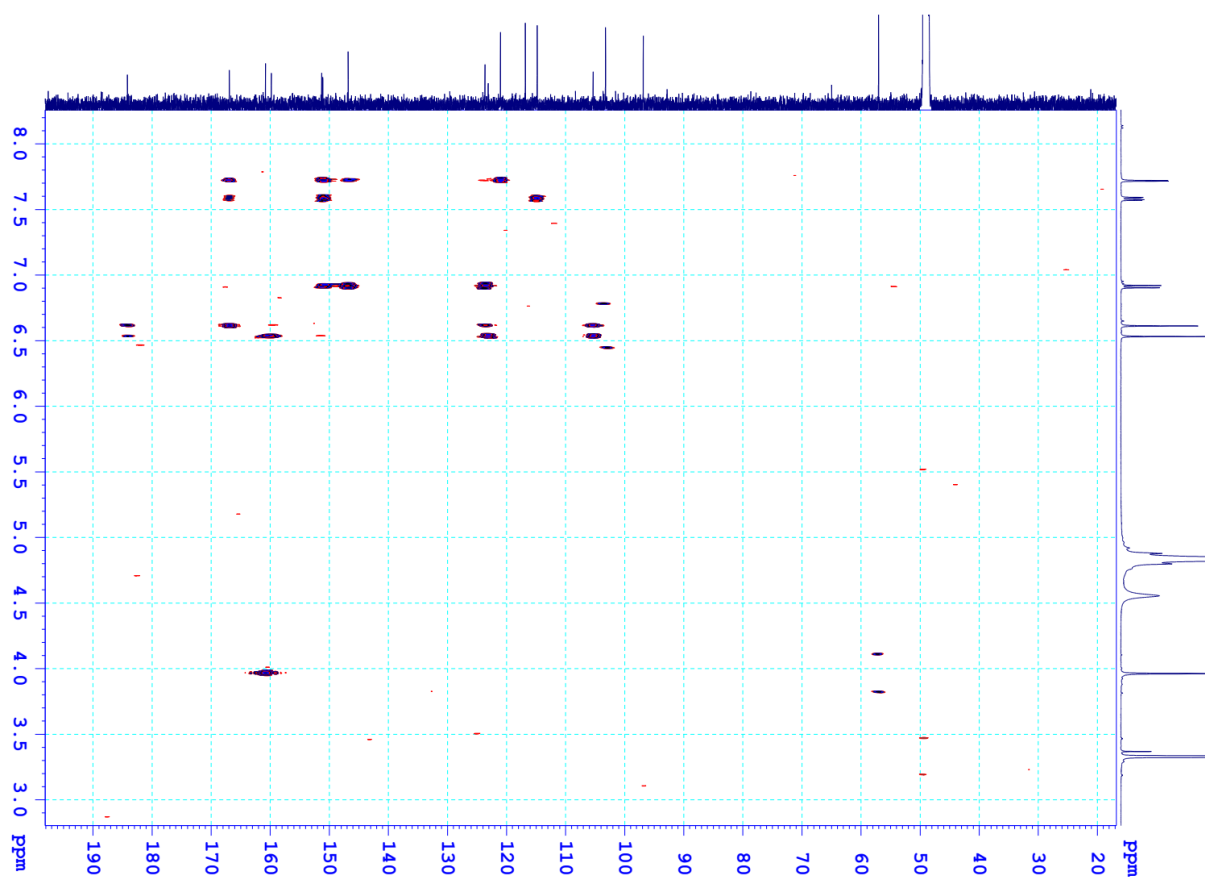

**Figure S4.** HMBC spectrum (CD<sub>3</sub>OD, 500 MHz) of compound **1**

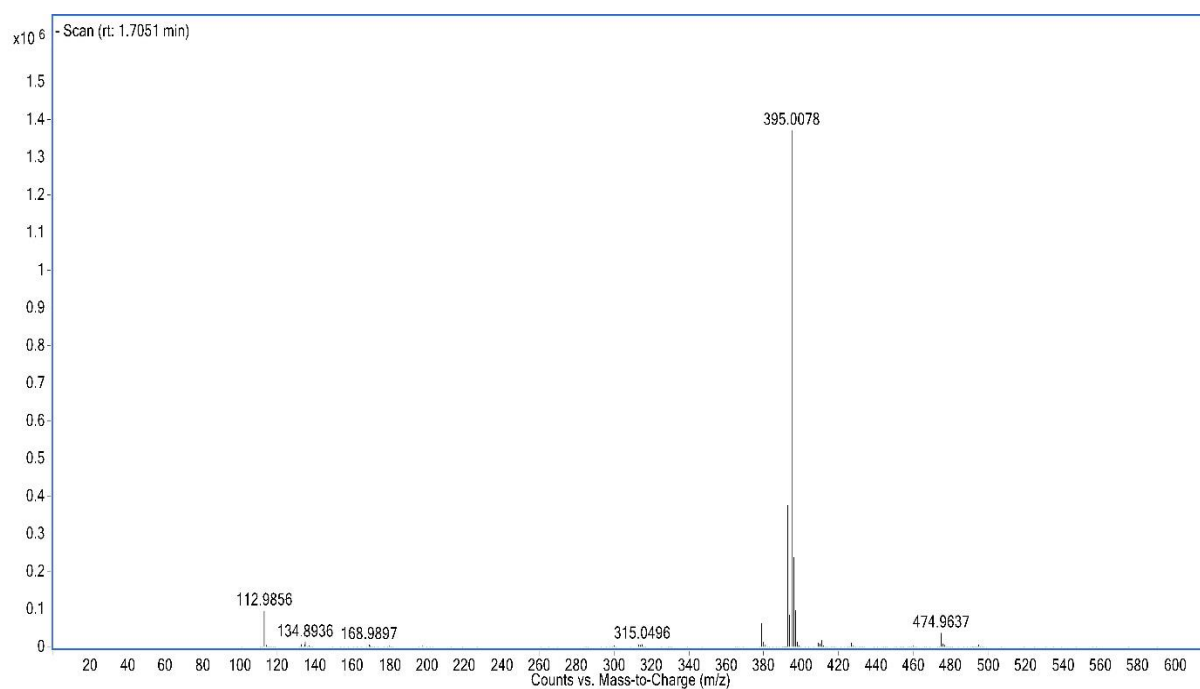

**Figure S5.** HR-QTOF mass spectrum of compound **1**

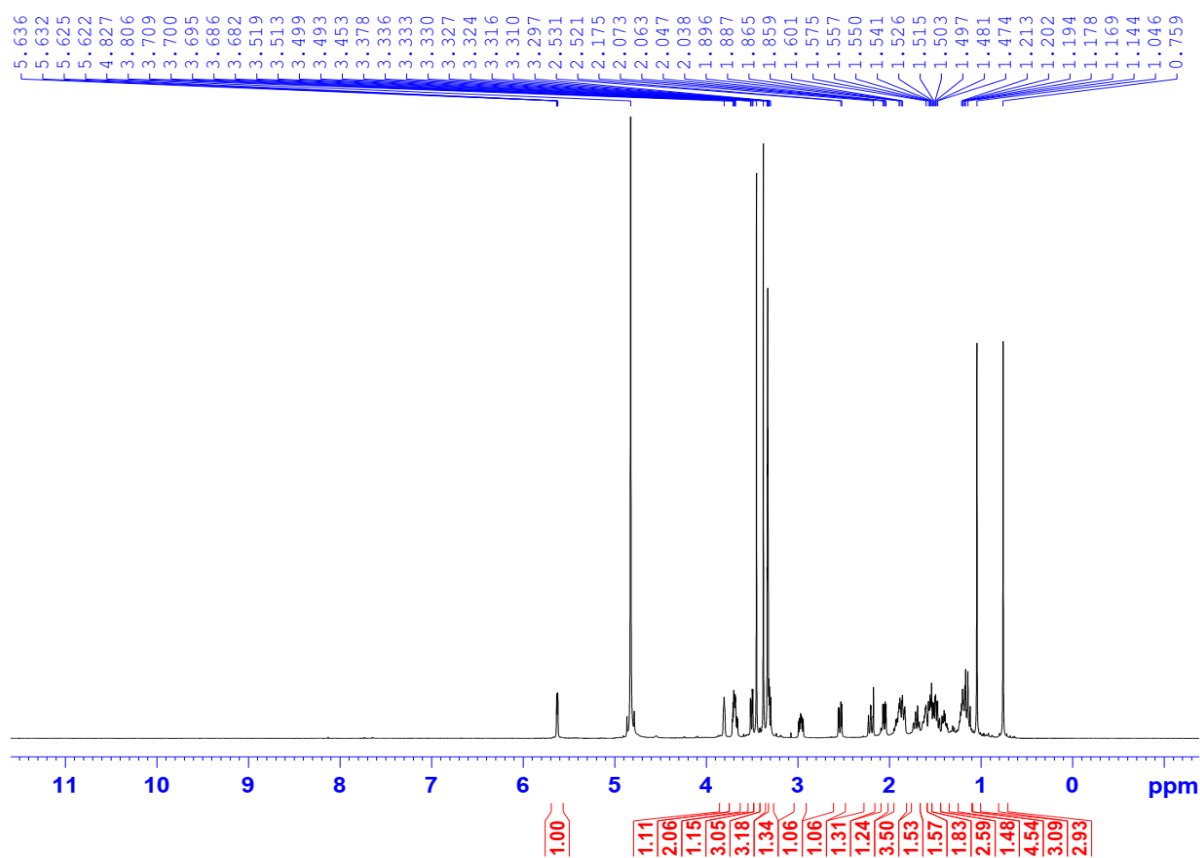

**Figure S6.** <sup>1</sup>H NMR spectrum (CD<sub>3</sub>OD, 500 MHz) of compound **5**

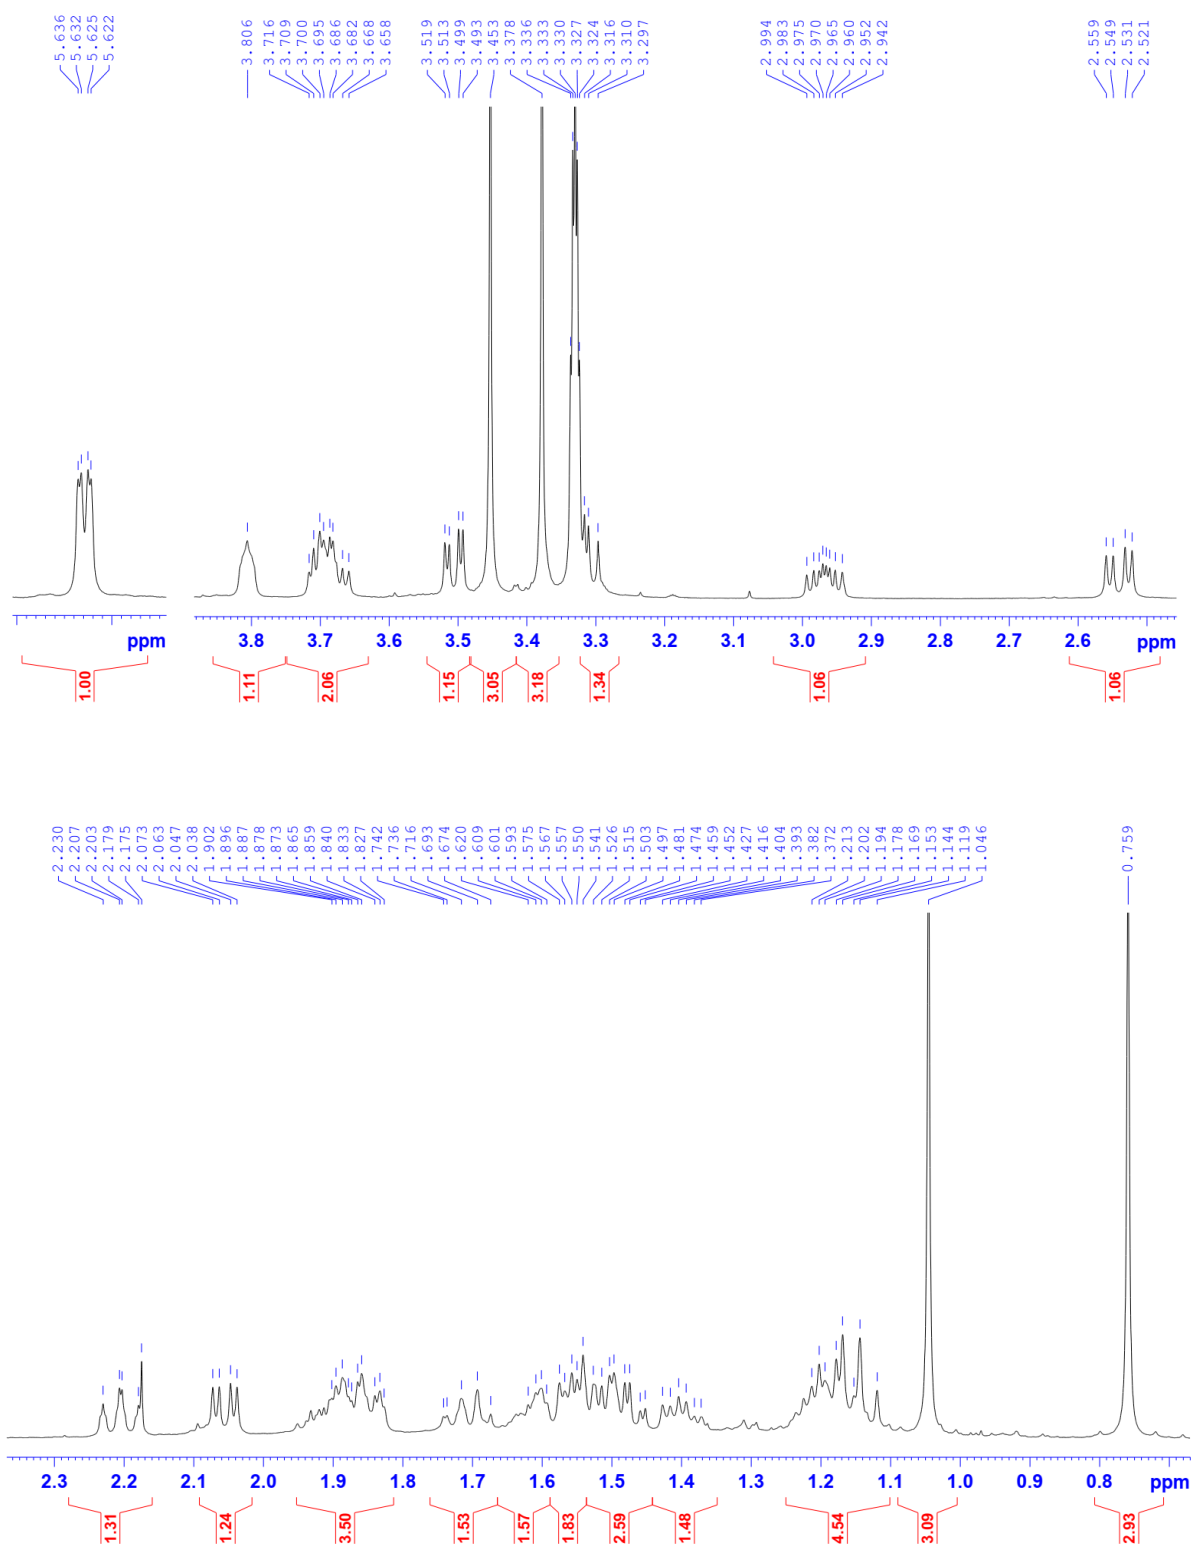

**Figure S7.** Expanded  $^1\text{H}$  NMR spectrum ( $\text{CD}_3\text{OD}$ , 500 MHz) of compound **5**

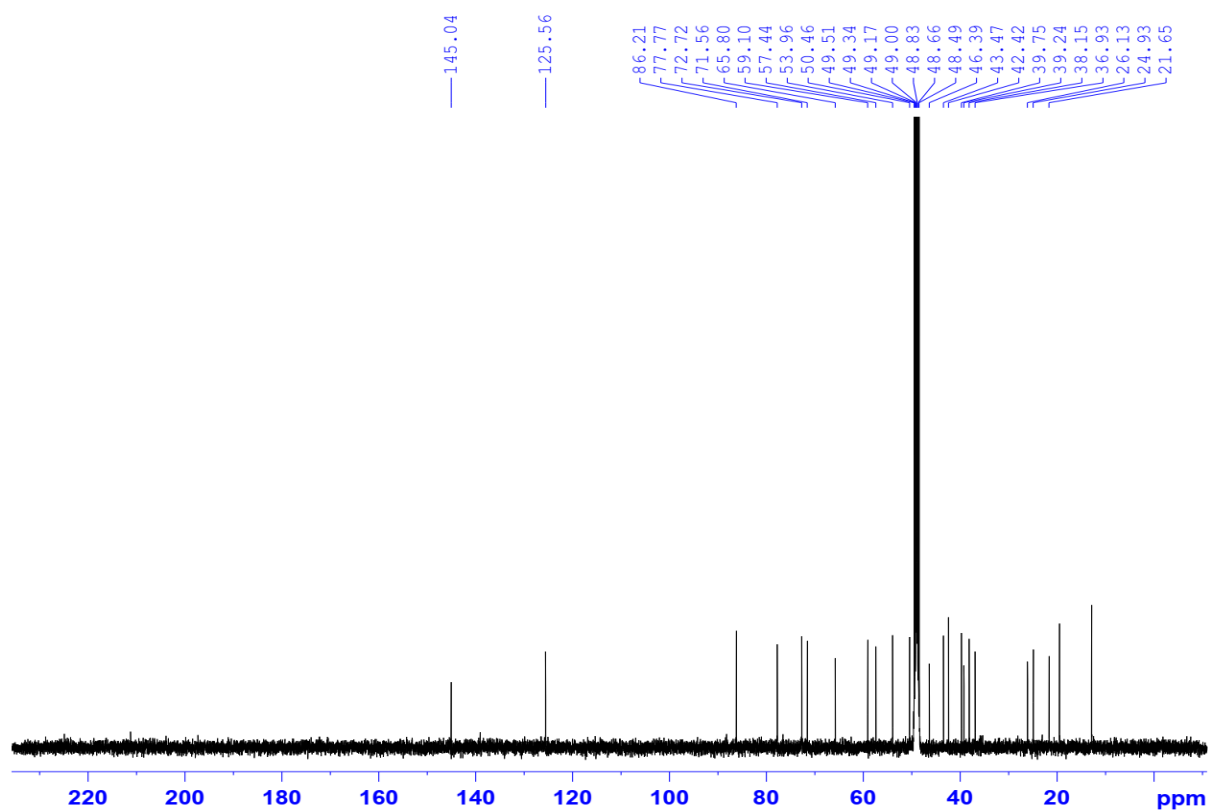

**Figure S8.** <sup>13</sup>C NMR spectrum (CD<sub>3</sub>OD, 125 MHz) of compound **5**

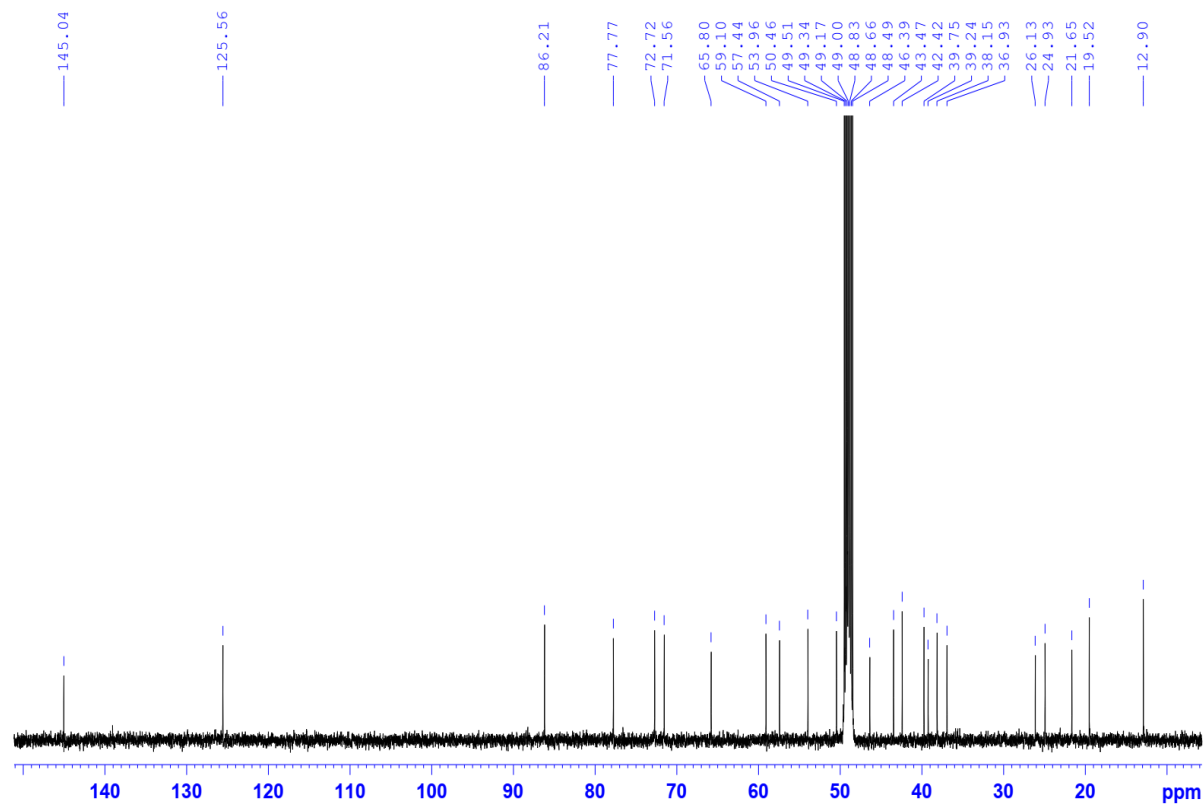

**Figure S9.** Expanded <sup>13</sup>C NMR spectrum (CD<sub>3</sub>OD, 125 MHz) of compound **5**

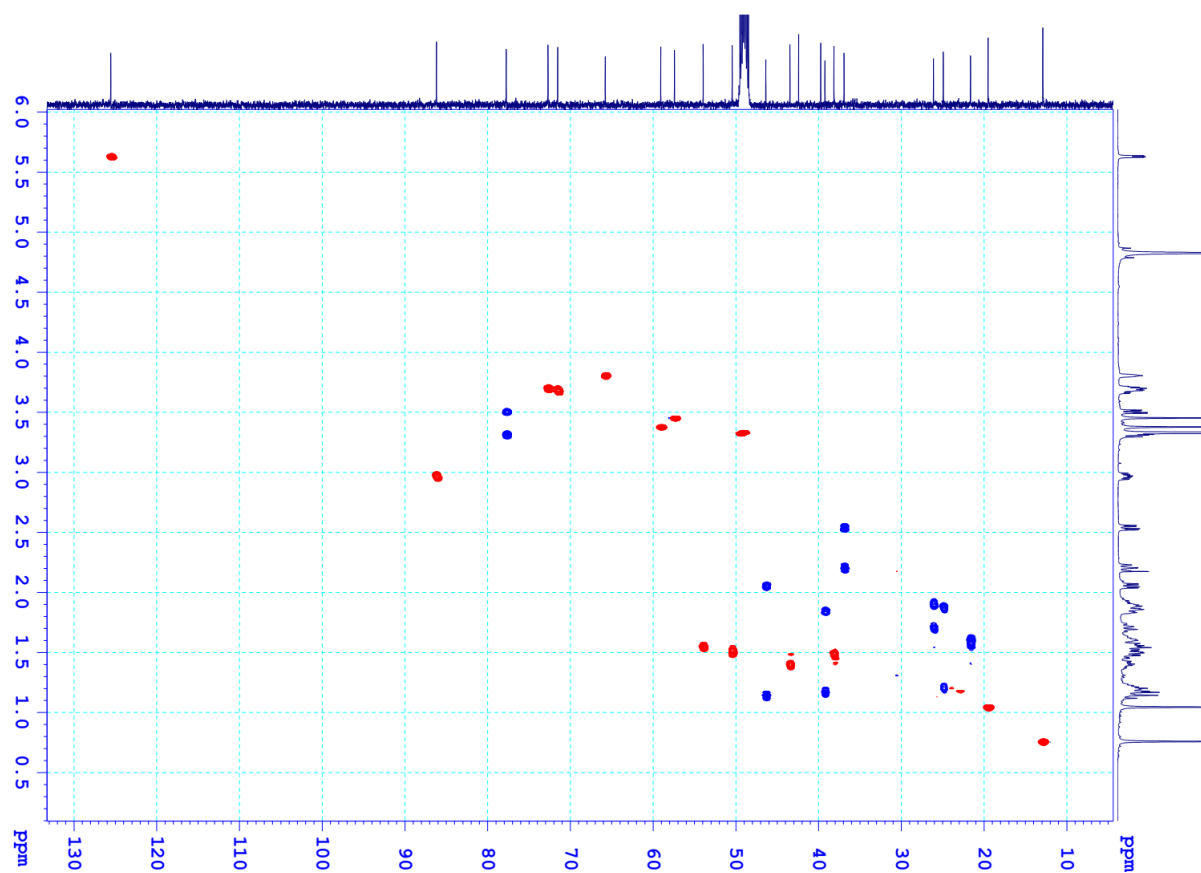

**Figure S10.** HSQC spectrum (CD<sub>3</sub>OD, 500 MHz) of compound **5**

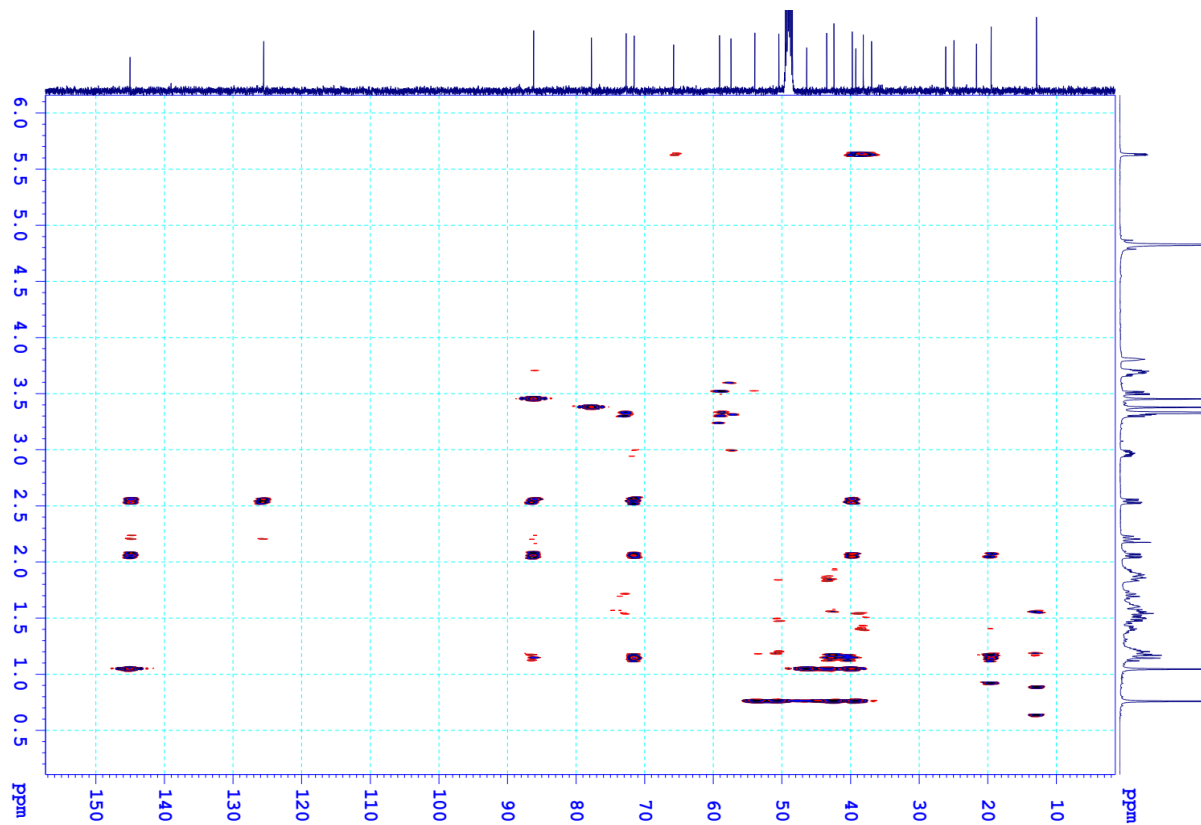

**Figure S11.** HMBC spectrum (CD<sub>3</sub>OD, 500 MHz) of compound **5**



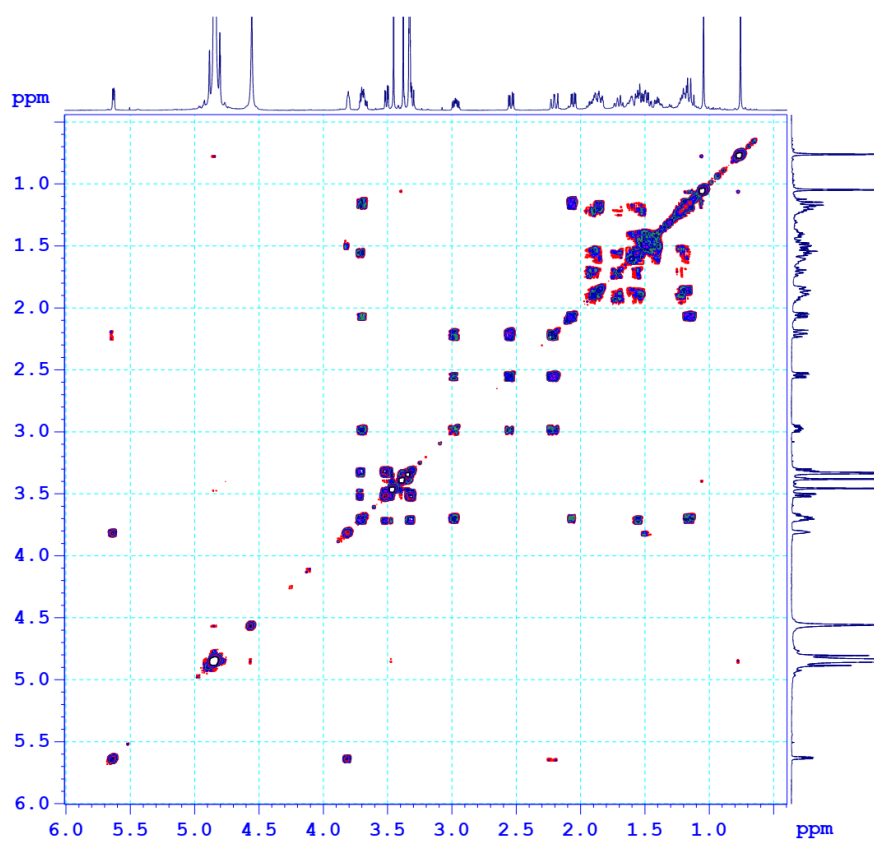

**Figure S12.** COSY spectrum (CD<sub>3</sub>OD, 500 MHz) of compound **5**

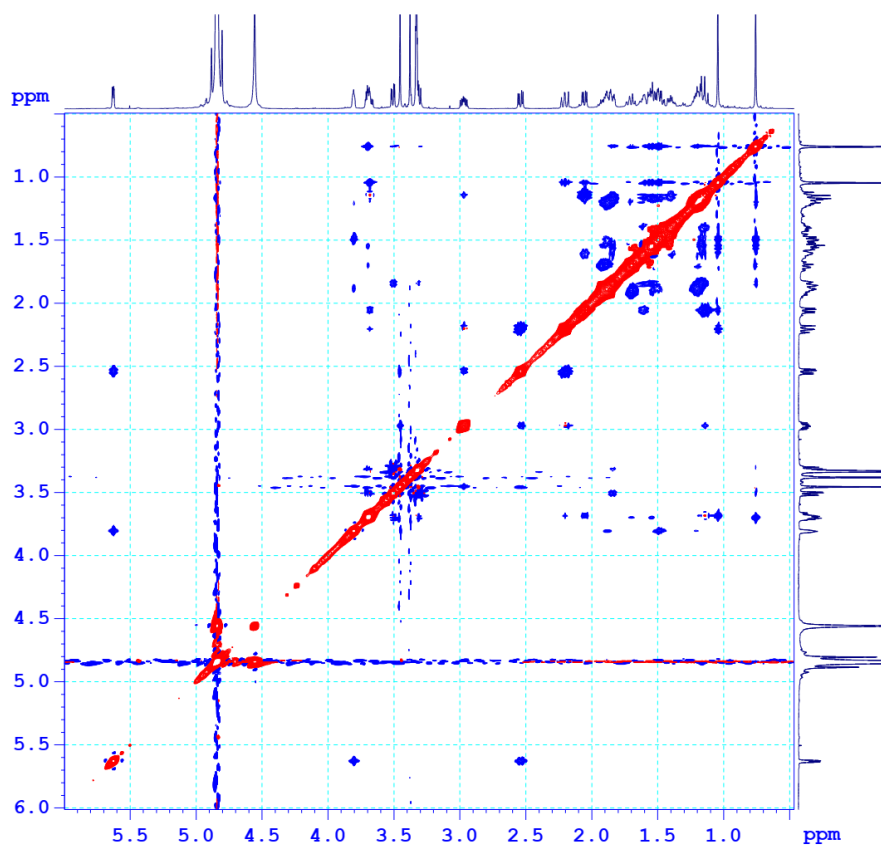

**Figure S13.** NOESY spectrum (CD<sub>3</sub>OD, 500 MHz) of compound **5**

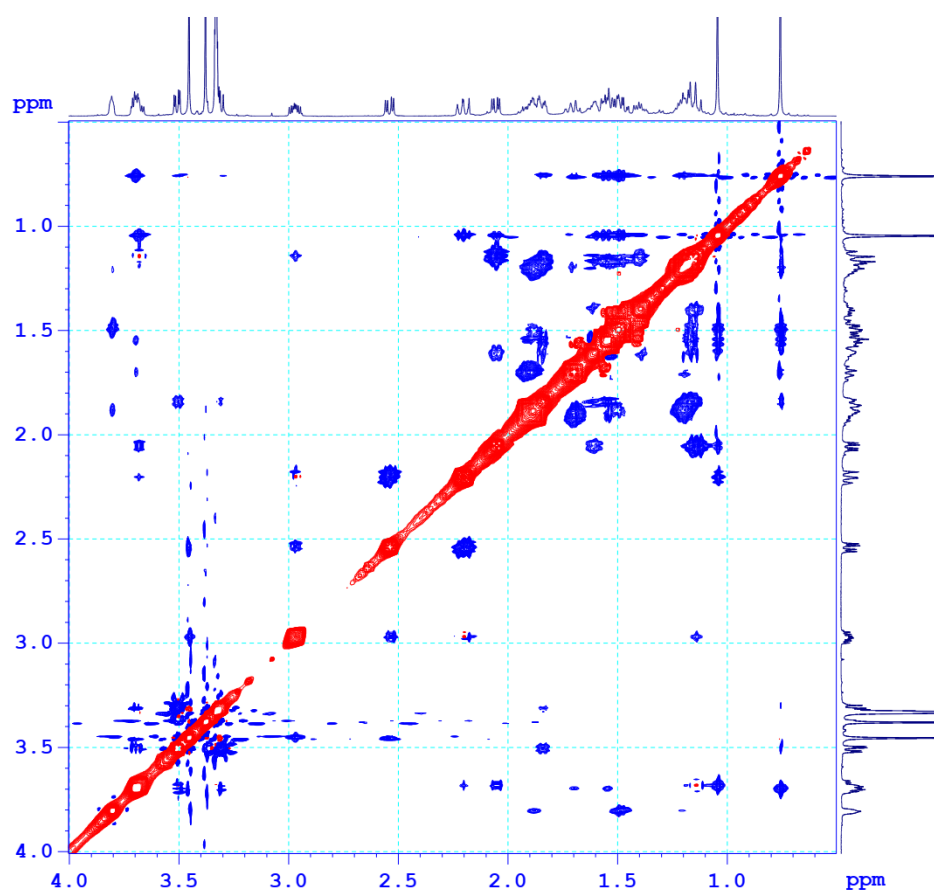

**Figure S14.** Expanded NOESY spectrum ( $\text{CD}_3\text{OD}$ , 500 MHz) of compound **5**

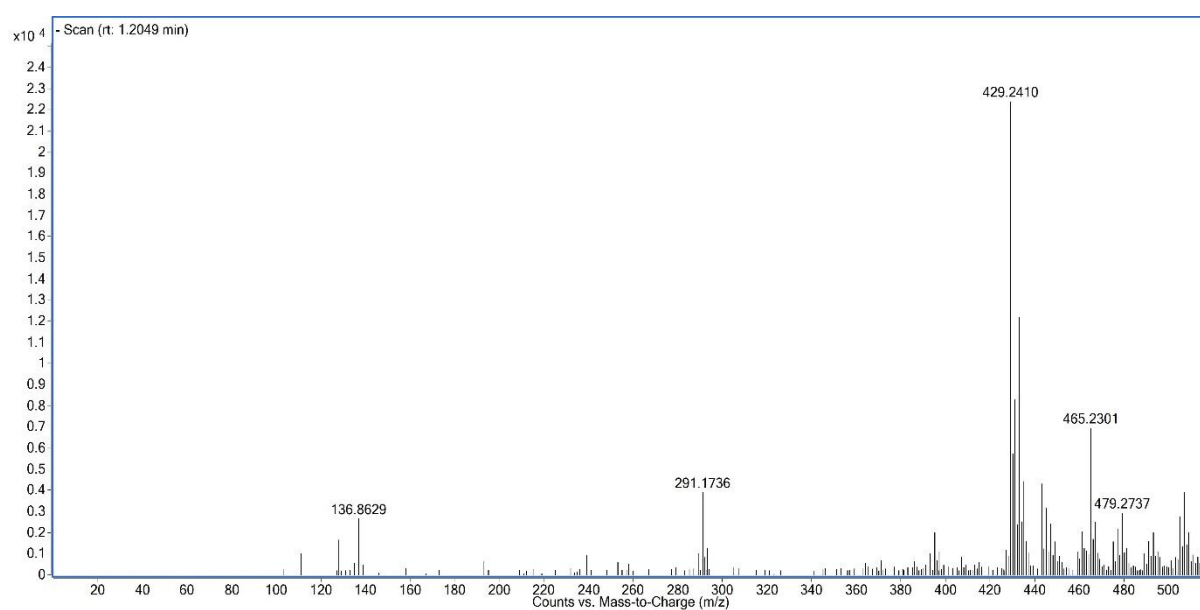

**Figure S15.** HR-QTOF mass spectrum of compound **5**

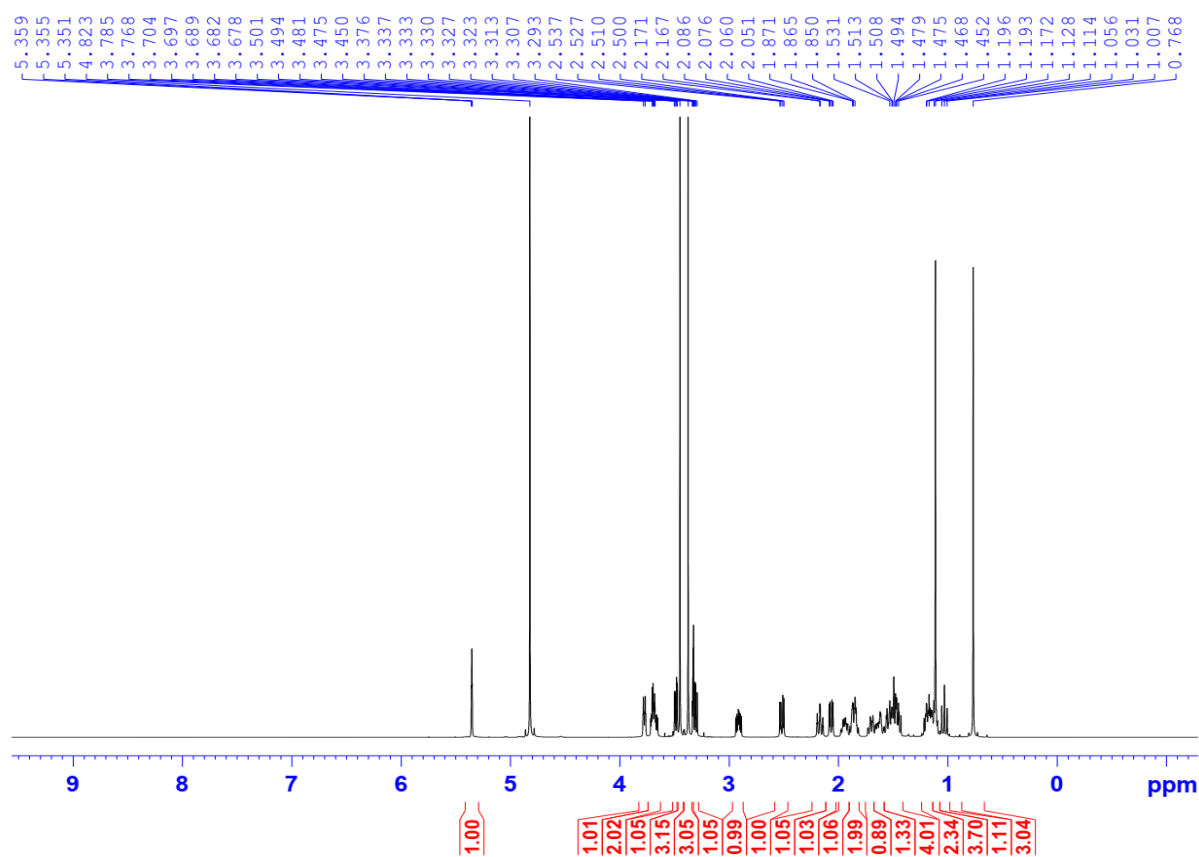

**Figure S16.** <sup>1</sup>H NMR spectrum (CD<sub>3</sub>OD, 500 MHz) of compound **6**

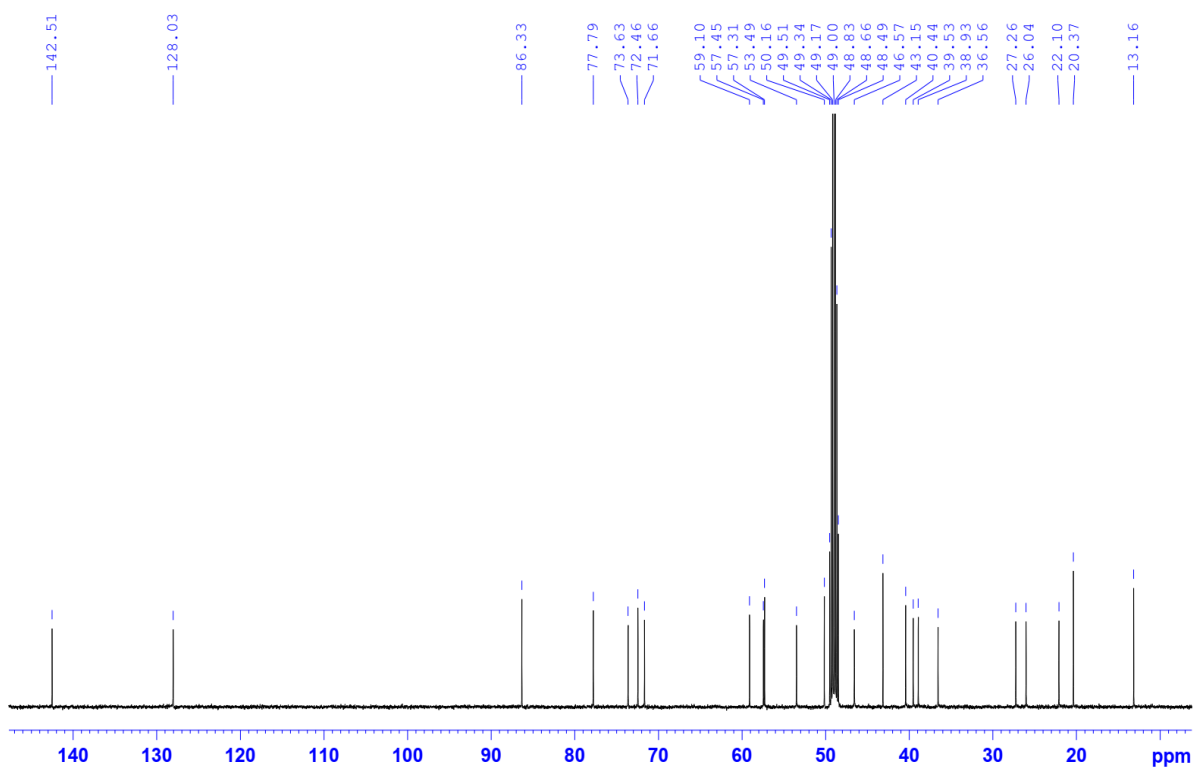

**Figure S17.** <sup>13</sup>C NMR spectrum (CD<sub>3</sub>OD, 125 MHz) of compound **6**

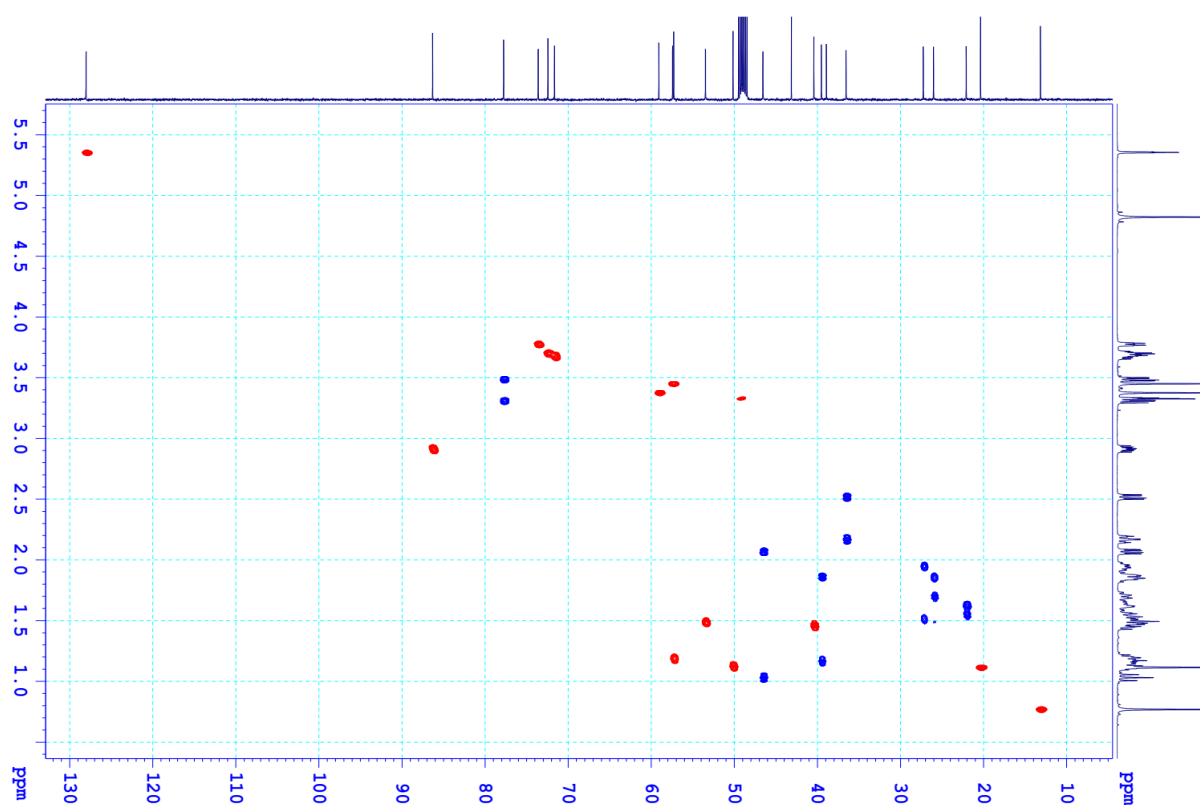

**Figure S18.** HSQC spectrum ( $\text{CD}_3\text{OD}$ , 500 MHz) of compound **6**

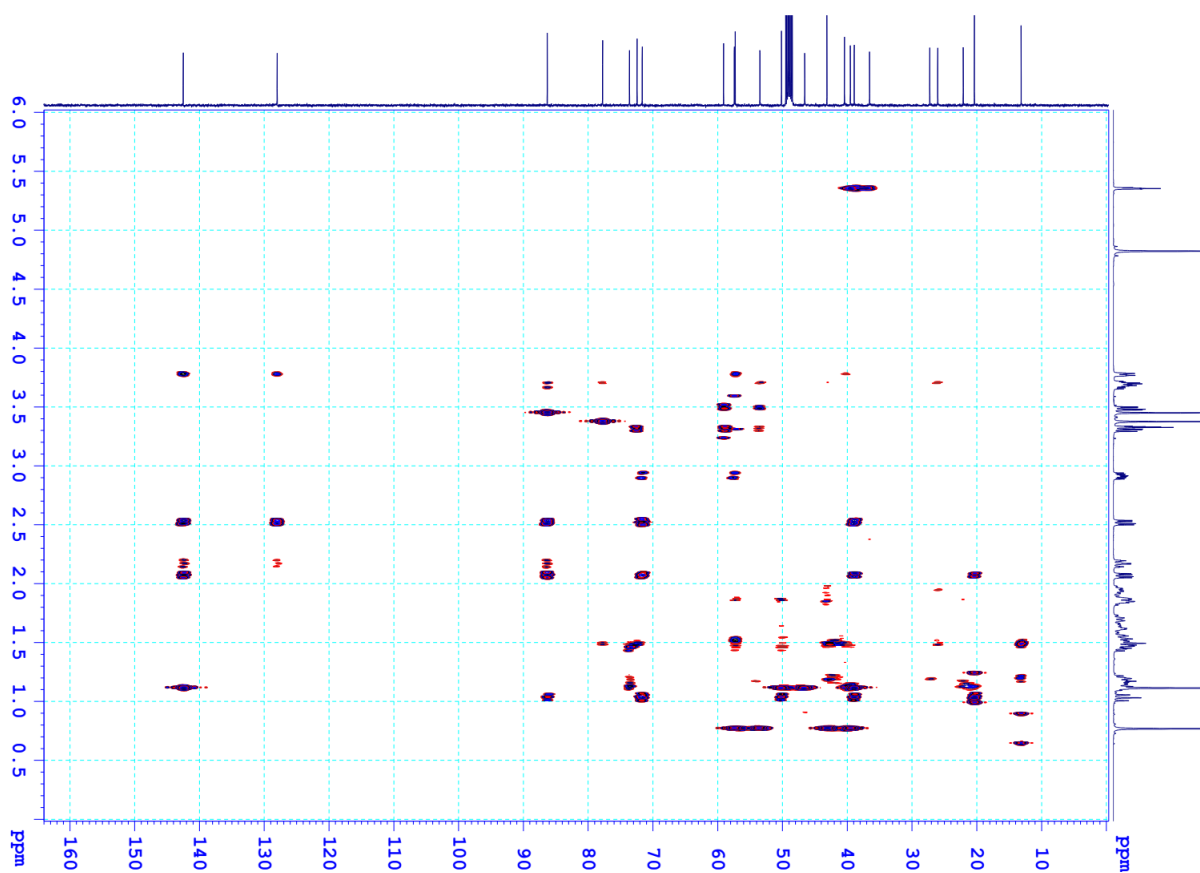

**Figure S19.** HMBC spectrum ( $\text{CD}_3\text{OD}$ , 500 MHz) of compound **6**

**Table S1.**  $^{13}\text{C}$  NMR ( $\text{CD}_3\text{OD}$ , 125 MHz) spectroscopic data of compounds **1**, **5** and **6**.

| C      | <sup>a</sup> $\delta_{\text{C}}$ | <sup>b</sup> $\delta_{\text{C}}$ | $\delta_{\text{C}}$ of <b>1</b> | C      | <sup>c</sup> $\delta_{\text{C}}$ | <sup>d</sup> $\delta_{\text{C}}$ | <sup>e</sup> $\delta_{\text{C}}$ | $\delta_{\text{C}}$ of <b>5</b> | $\delta_{\text{C}}$ of <b>6</b> |
|--------|----------------------------------|----------------------------------|---------------------------------|--------|----------------------------------|----------------------------------|----------------------------------|---------------------------------|---------------------------------|
| 2      | 163.4                            | 164.7                            | 166.9                           | 1      | 37.6                             | 37.0                             | 46.6                             | 46.4                            | 46.6                            |
| 3      | 102.9                            | 102.7                            | 103.3                           | 2      | 32.4                             | 31.4                             | 71.7                             | 71.6                            | 71.6                            |
| 4      | 182.3                            | 182.6                            | 184.2                           | 3      | 71.1                             | 71.4                             | 86.4                             | 86.2                            | 86.3                            |
| 5      | 153.0                            | -                                | 159.8                           | 4      | 43.4                             | 41.7                             | 36.6                             | 36.9                            | 36.5                            |
| 6      | 95.6                             | 95.8                             | 96.9                            | 5      | 144.9                            | 143.5                            | 142.5                            | 145.0                           | 142.5                           |
| 7      | 154.2                            | 159.1                            | 160.8                           | 6      | 125.5                            | 125.4                            | 128.0                            | 125.6                           | 128.0                           |
| 8      | 126.1                            | 123.2                            | 123.1                           | 7      | 64.8                             | 73.3                             | 73.7                             | 65.8                            | 73.6                            |
| 9      | 144.3                            | 148.8                            | 151.3                           | 8      | 38.4                             | 40.9                             | 40.5                             | 38.1                            | 40.4                            |
| 10     | 103.8                            | 104.7                            | 105.4                           | 9      | 42.7                             | 48.3                             | 50.2                             | 43.5                            | 50.1                            |
| 1'     | 122.9                            | 123.6                            | 123.7                           | 10     | 37.7                             | 36.9                             | 38.9                             | 39.7                            | 38.9                            |
| 2'     | 128.4                            | 113.8                            | 114.8                           | 11     | 21.2                             | 21.1                             | 26.1                             | 21.6                            | 22.1*                           |
| 3'     | 114.4                            | 146.8                            | 146.8                           | 12     | 39.8                             | 39.5                             | 39.5                             | 39.2                            | 39.5                            |
| 4'     | 162.3                            | 151.6                            | 151.1                           | 13     | 42.3                             | 42.0                             | 43.2                             | 42.4                            | 43.1                            |
| 5'     | 114.4                            | 111.8                            | 116.8                           | 14     | 50.2                             | 55.6                             | 57.3                             | 50.5                            | 57.3                            |
| 6'     | 128.4                            | 119.8                            | 121.0                           | 15     | 24.7                             | 26.4                             | 22.1                             | 24.9                            | 26.0*                           |
| 7-OMe  | 56.2                             | 56.4                             | 57.0                            | 16     | 28.7                             | 28.4                             | 27.3                             | 26.1                            | 27.2                            |
| 4'-OMe | 55.5                             | 55.7                             |                                 | 17     | 56.2                             | 55.9                             | 53.5                             | 53.9                            | 53.5                            |
|        |                                  |                                  |                                 | 18     | 12.0                             | 11.8                             | 13.2                             | 12.9                            | 13.1                            |
|        |                                  |                                  |                                 | 19     | 18.8                             | 19.1                             | 20.4                             | 19.5                            | 20.4                            |
|        |                                  |                                  |                                 | 20     |                                  |                                  | 72.5                             | 72.7                            | 72.4                            |
|        |                                  |                                  |                                 | 21     |                                  |                                  | 77.8                             | 77.8                            | 77.8                            |
|        |                                  |                                  |                                 | 3-OMe  |                                  |                                  | 57.4                             | 57.4                            | 57.4                            |
|        |                                  |                                  |                                 | 21-OMe |                                  |                                  | 59.1                             | 59.1                            | 59.1                            |

<sup>a</sup> $\delta_{\text{C}}$  of 7,4'-di-*O*-methylisoscuteallarein in  $\text{DMSO}-d_6$  (Horie et al. 1998), <sup>b</sup> $\delta_{\text{C}}$  of 5,3'-di-hydroxy-7,4'-dimethoxy-8-*O*-sulphate flavone (condadine) in  $\text{DMSO}-d_6$  (Fernandes et al. 2018), <sup>c</sup> $\delta_{\text{C}}$  of (24*S*)-ergost-5-ene-3 $\beta$ ,7 $\alpha$ -diol in  $\text{CDCl}_3$  (Kobayashi et al. 1993), <sup>d</sup> $\delta_{\text{C}}$  of (24*S*)-ergost-5-en-3 $\beta$ ,7 $\beta$ -diol in  $\text{CDCl}_3$  (Muralidhar et al. 2005), <sup>e</sup> $\delta_{\text{C}}$  of heligenin B in  $\text{CD}_3\text{OD}$  (Wang et al. 2012), \*Due to 2D NMR experiments, the reported  $^{13}\text{C}$ -NMR chemical shifts at C-11 and C-15 of heligenin B (**6**) (Wang et al. 2012) must be reassigned as shown.

## References

- Fernandes DA, Souza MSR, Teles YCF, Oliveira LHG, Lima JB, Conceicao AS, Nunes FC, Silva TMS, Souza MFV. 2018. New sulphated flavonoids and larvicidal activity of *Helicteres velutina* K. Schum (Sterculiaceae). *Molecules*. 23(11):2784.
- Hòrie T, Ohtsuru Y, Shibata K, Yamashita K, Tsukayama M, Kawamura Y. 1998.  $^{13}\text{C}$  NMR spectral assignment of the A-ring of polyoxygenated flavones. *Phytochemistry*. 47(5):865-874.
- Kobayashi M, Mrishna MM, Haribabu B, Anjaneyulu V. 1993. Marine sterol. XXV. Isolation of 23-demethylgorgost-7-ene-3 $\beta$ ,5 $\alpha$ ,6 $\beta$ -triol and (24*S*)-ergostane-3 $\beta$ ,5 $\alpha$ ,6 $\beta$ ,7 $\beta$ ,15 $\beta$ -pentol from soft corals of the Andaman and Nicobar coasts. *Chem Pharm Bull*. 41(1):87-89.
- Muralidhar P, Kumar MM, Krishna N, Rao CB, Rao DV. 2005. New sphingolipids and a sterol from a *Lobophytum* species of the Indian ocean. *Chem Pharm Bull*. 53(2):168-171.
- Wang GC, Li T, Wei YR, Zhang YB, Li YL, Sze SC, Ye WC. 2012. Two pregnane derivatives and a quinolone alkaloid from *Helicteres angustifolia*. *Fitoterapia*. 83(8):1643-1647.
